# Supplementary material for: Greatly Enhancing Catalytic Activity of Graphene by Doping the Underlying Metal Substrate
Source: PubMed Central journal article supplement (PMC4496776; doi:10.1038/srep12058), 2015-07-09
Supplement: srep12058-s1.pdf [file srep12058-s1.pdf]

## Greatly Enhancing Catalytic Activity of Graphene by Doping the Underlying Metal Substrate

Na Guo,<sup>‡,†</sup> Yongjie Xi,<sup>‡,§,†</sup> Shuanglong Liu,<sup>†</sup> and Chun Zhang<sup>\*,†,§</sup>

<sup>†</sup>Department of Physics and Graphene Research Centre, National University of Singapore, Singapore 117542

<sup>§</sup>Department of Chemistry, National University of Singapore, Singapore 117542

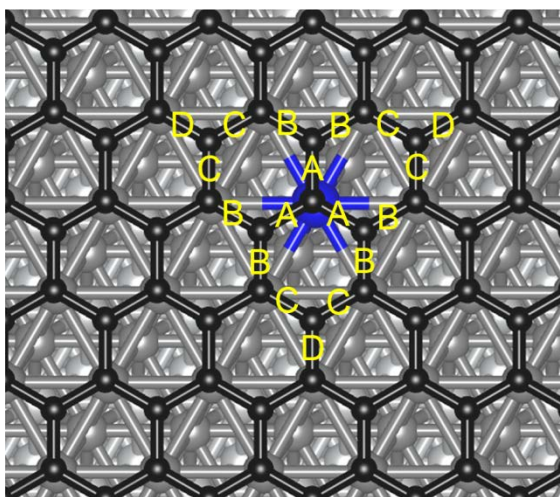

**Figure S1.** Possible adsorption sites of O<sub>2</sub> on graphene-Zn@Fe/Ni (111). We tested four inequivalent sites near the impurity Zn (denoted as A, B, C, D in the figure). The calculated adsorption energies are 0.42 eV for site A, 0.02 eV for site B, and there are no binding of O<sub>2</sub> on other sites.

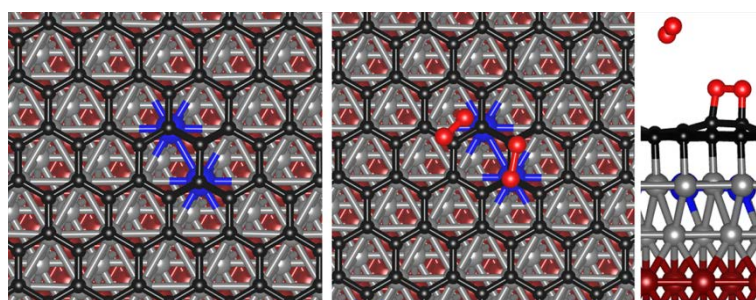

**Figure S2.** Left: Two Zn impurities are close to each other; Middle: The adsorption of two O<sub>2</sub> molecules on graphene-Zn@Fe/Ni (111). Right: Side view. Note that in this case, only one O<sub>2</sub> is adsorbed.

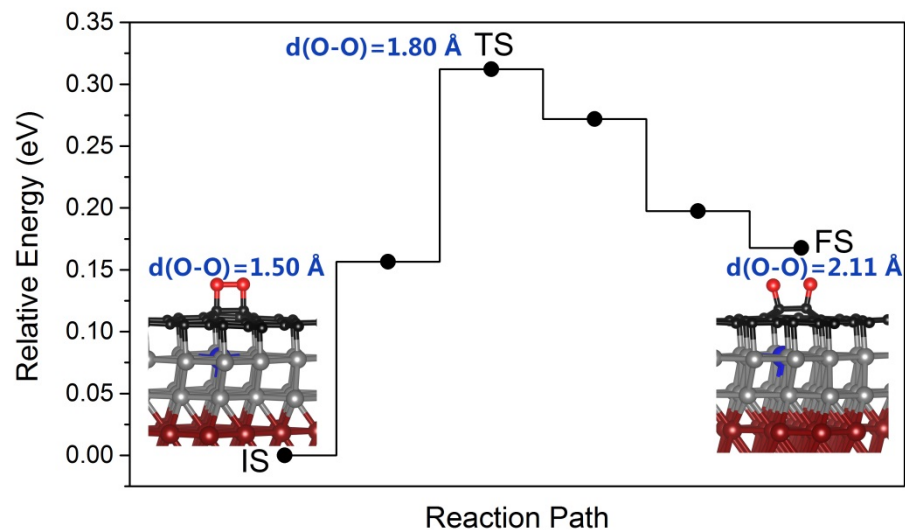

**Figure S3.** Energy profile of  $\text{O}_2$  dissociation on graphene-Zn@Fe/Ni (111). Simulations were done using c-NEB method. It was found that about  $0.31 \text{ eV}$  is needed to break the O-O bond of  $\text{O}_2$  adsorbed on graphene surface. Initial State (IS):  $\text{O}_2$  adsorbed on graphene with a bond length of  $1.50 \text{ \AA}$ . Transition State (TS): the O-O bond length is  $1.80 \text{ \AA}$ . Final State (FS):  $\text{O}_2$  dissociated on graphene.
